# Supplementary material
Source: PubMed Central journal article supplement (PMC2505175)
Supplement: NIHMS58492-supplement-1.pdf [file NIHMS58492-supplement-1.pdf]

Supporting Information for

Dioxygen-Initiated Oxidation of Heteroatomic  
Substrates Incorporated into Ancillary Pyridine  
Ligands of Carboxylate-Rich Diiron(II) Complexes

*Emily C. Carson and Stephen J. Lippard\**

Department of Chemistry, Massachusetts Institute of Technology, Cambridge, Massachusetts  
02139

[lippard@mit.edu](mailto:lippard@mit.edu)

RECEIVED DATE August 00, 2005

**Table S1.** Summary of X-ray Crystallographic Data.

|                                          | <b>3·C<sub>2</sub>H<sub>4</sub>Cl<sub>2</sub></b>                                               | <b>4·1.5C<sub>2</sub>H<sub>4</sub>Cl<sub>2</sub>/C<sub>5</sub>H<sub>12</sub></b> | <b>5·C<sub>6</sub>H<sub>5</sub>Cl</b>                                                                          |
|------------------------------------------|-------------------------------------------------------------------------------------------------|----------------------------------------------------------------------------------|----------------------------------------------------------------------------------------------------------------|
| Empirical Formula                        | Fe <sub>2</sub> C <sub>95</sub> H <sub>62</sub> NO <sub>8</sub> F <sub>8</sub> PCl <sub>2</sub> | Fe <sub>2</sub> C <sub>98</sub> H <sub>93</sub> NO <sub>8</sub> SCl <sub>3</sub> | Fe <sub>2</sub> C <sub>108</sub> H <sub>92</sub> N <sub>2</sub> O <sub>10</sub> S <sub>2</sub> Cl <sub>2</sub> |
| Formula Weight                           | 1711.03                                                                                         | 1662.84                                                                          | 1824.56                                                                                                        |
| Space Group                              | P $\bar{1}$                                                                                     | P2 <sub>1</sub> /c                                                               | P $\bar{1}$                                                                                                    |
| a, Å                                     | 13.6676(14)                                                                                     | 13.0032(6)                                                                       | 12.3481(13)                                                                                                    |
| b, Å                                     | 14.0155(14)                                                                                     | 26.3878(12)                                                                      | 13.2842(13)                                                                                                    |
| c, Å                                     | 21.278(2)                                                                                       | 24.6935(12)                                                                      | 14.8486(16)                                                                                                    |
| $\alpha$ , deg                           | 80.799(2)                                                                                       |                                                                                  | 107.009(2)                                                                                                     |
| $\beta$ , deg                            | 89.079(2)                                                                                       | 95.8440(10)                                                                      | 103.260(2)                                                                                                     |
| $\gamma$ , deg                           | 86.533(2)                                                                                       |                                                                                  | 95.274(3)                                                                                                      |
| V, Å <sup>3</sup>                        | 4016.0(7)                                                                                       | 8428.9(7)                                                                        | 2233.7(4)                                                                                                      |
| Z                                        | 2                                                                                               | 4                                                                                | 1                                                                                                              |
| $\rho_{\text{calc}}$ , g/cm <sup>3</sup> | 1.415                                                                                           | 1.310                                                                            | 1.356                                                                                                          |
| T, °C                                    | -100                                                                                            | -100                                                                             | -100                                                                                                           |
| $\mu$ (Mo K $\alpha$ ), mm <sup>-1</sup> | 0.526                                                                                           | 0.523                                                                            | 0.495                                                                                                          |
| $\theta$ limits, deg                     | 1.47 – 26.73                                                                                    | 1.66 – 27.10                                                                     | 1.63 – 26.02                                                                                                   |
| total no. of data                        | 33796                                                                                           | 72962                                                                            | 18030                                                                                                          |
| no. of unique data                       | 16744                                                                                           | 18576                                                                            | 8699                                                                                                           |
| no. of params                            | 1099                                                                                            | 1279                                                                             | 572                                                                                                            |
| Goodness-of-fit on F <sup>2</sup>        | 1.030                                                                                           | 1.196                                                                            | 0.769                                                                                                          |
| R1 <sup>a</sup>                          | 0.0709                                                                                          | 0.0786                                                                           | 0.0744                                                                                                         |
| wR <sup>2b</sup>                         | 0.1767                                                                                          | 0.1679                                                                           | 0.0999                                                                                                         |
| max, min peaks, e/Å <sup>3</sup>         | 1.124, -1.036                                                                                   | 1.031, -0.610                                                                    | 0.463, -0.323                                                                                                  |

$$^a R1 = \frac{\sum ||F_o| - F_c||}{\sum |F_o|} \quad ^b wR^2 = \left\{ \frac{\sum [w(F_o^2 - F_c^2)^2]}{\sum [w(F_o^2)^2]} \right\}^{1/2}$$

Table S1. Continued.

|                                          | <b>6</b>                                                                       | <b>7·4CH<sub>2</sub>Cl<sub>2</sub></b>                                                                           | <b>8·3CH<sub>2</sub>Cl<sub>2</sub></b>                                                           |
|------------------------------------------|--------------------------------------------------------------------------------|------------------------------------------------------------------------------------------------------------------|--------------------------------------------------------------------------------------------------|
| Empirical Formula                        | FeC <sub>52</sub> H <sub>44</sub> N <sub>2</sub> O <sub>4</sub> S <sub>2</sub> | Fe <sub>6</sub> C <sub>122</sub> H <sub>110</sub> N <sub>2</sub> O <sub>18</sub> P <sub>2</sub> Cl <sub>12</sub> | Fe <sub>2</sub> C <sub>96</sub> H <sub>68</sub> NO <sub>12</sub> F <sub>8</sub> PCl <sub>6</sub> |
| Formula Weight                           | 880.86                                                                         | 2714.56                                                                                                          | 1934.88                                                                                          |
| Space Group                              | P2 <sub>1</sub> /c                                                             | P $\bar{1}$                                                                                                      | P $\bar{1}$                                                                                      |
| a, Å                                     | 18.821(19)                                                                     | 14.508(2)                                                                                                        | 12.9063(17)                                                                                      |
| b, Å                                     | 12.262(12)                                                                     | 15.852(2)                                                                                                        | 14.1811(18)                                                                                      |
| c, Å                                     | 21.18(2)                                                                       | 15.904(3)                                                                                                        | 24.990(3)                                                                                        |
| $\alpha$ , deg                           |                                                                                | 78.407(3)                                                                                                        | 78.235(3)                                                                                        |
| $\beta$ , deg                            | 115.123(16)                                                                    | 77.951(3)                                                                                                        | 86.110(2)                                                                                        |
| $\gamma$ , deg                           |                                                                                | 63.832(3)                                                                                                        | 86.837(3)                                                                                        |
| V, Å <sup>3</sup>                        | 4425(8)                                                                        | 4042(9)                                                                                                          | 4463.4(10)                                                                                       |
| Z                                        | 4                                                                              | 1                                                                                                                | 2                                                                                                |
| $\rho_{\text{calc}}$ , g/cm <sup>3</sup> | 1.322                                                                          | 1.415                                                                                                            | 1.440                                                                                            |
| T, °C                                    | -100                                                                           | -100                                                                                                             | -100                                                                                             |
| $\mu$ (Mo K $\alpha$ ), mm <sup>-1</sup> | 0.483                                                                          | 1.004                                                                                                            | 0.602                                                                                            |
| $\theta$ limits, deg                     | 1.95 – 27.16                                                                   | 1.64 – 25.00                                                                                                     | 1.67 – 27.10                                                                                     |
| total no. of data                        | 37528                                                                          | 23654                                                                                                            | 39033                                                                                            |
| no. of unique data                       | 9779                                                                           | 11127                                                                                                            | 19334                                                                                            |
| no. of params                            | 550                                                                            | 730                                                                                                              | 1151                                                                                             |
| Goodness-of-fit on F <sup>2</sup>        | 1.131                                                                          | 0.997                                                                                                            | 0.997                                                                                            |
| R1 <sup>a</sup>                          | 0.0566                                                                         | 0.1032                                                                                                           | 0.0855                                                                                           |
| wR <sup>2b</sup>                         | 0.1240                                                                         | 0.1826                                                                                                           | 0.1521                                                                                           |
| max, min peaks, e/Å <sup>3</sup>         | 0.505, -0.278                                                                  | 1.028, -0.551                                                                                                    | 0.779, -0.721                                                                                    |

$$^a R1 = \frac{\sum ||F_o| - F_c||}{\sum |F_o|} \quad ^b wR^2 = \left\{ \frac{\sum [w(F_o^2 - F_c^2)^2]}{\sum [w(F_o^2)^2]} \right\}^{1/2}$$

**Table S2.** Selected Interbond Lengths and Angles for  $[\text{Fe}_2(\mu\text{-O}_2\text{CAr}^{\text{Tol}})_2(\text{O}_2\text{CAr}^{\text{Tol}})_2\text{-}(2\text{-MeS(O)py})_2]$  (**5**)<sup>a</sup>

|           | Bond Length (Å) |           | Bond Angle (deg) |  |
|-----------|-----------------|-----------|------------------|--|
| Fe1...Fe2 | 4.586(2)        | O1-Fe1-N1 | 79.1(3)          |  |
| Fe1-N1    | 2.156(6)        | O2-Fe1-N1 | 96.7(2)          |  |
| Fe1-O1    | 2.234(5)        | O3-Fe1-N1 | 92.4(2)          |  |
| Fe1-O2    | 1.961(5)        | O4-Fe1-N1 | 83.62(18)        |  |
| Fe1-O3    | 2.071(5)        | O5-Fe1-N1 | 149.98(19)       |  |
| Fe1-O4    | 2.160(5)        | O1-Fe1-O2 | 82.09(19)        |  |
| Fe1-O5    | 2.267(5)        | O1-Fe1-O3 | 171.5(2)         |  |
|           |                 | O1-Fe1-O4 | 83.7(2)          |  |
|           |                 | O1-Fe1-O5 | 97.75(17)        |  |
|           |                 | O2-Fe1-O3 | 98.6(2)          |  |
|           |                 | O2-Fe1-O4 | 163.3(2)         |  |
|           |                 | O2-Fe1-O5 | 112.7(2)         |  |
|           |                 | O3-Fe1-O4 | 96.08(18)        |  |
|           |                 | O3-Fe1-O5 | 89.31(17)        |  |
|           |                 | O4-Fe1-O5 | 59.28(17)        |  |

<sup>a</sup>Numbers in parentheses are estimated standard deviations of the last significant figure. Atoms are labeled as indicated Figures 1 and S4.

**Table S3.** Selected Interbond Distances and Angles for  $[\text{Fe}_2(\text{O}_2\text{CAr}^{\text{Tot}})_2(2\text{-HSpY})_2]$  (**6**)<sup>a</sup>

|         | Bond Length (Å) |           | Bond Angle (deg) |
|---------|-----------------|-----------|------------------|
| Fe1–O1  | 2.052(2)        | O1–Fe1–S1 | 102.69(8)        |
| Fe1–O3  | 2.029(3)        | O1–Fe1–S2 | 110.22(6)        |
| Fe1–S1  | 2.398(2)        | O3–Fe1–S1 | 112.35(5)        |
| Fe1–S2  | 2.398(3)        | O3–Fe1–S2 | 98.59(6)         |
| N1–C1   | 1.348(3)        | O1–Fe1–O3 | 133.35(9)        |
| C1–C2   | 1.407(4)        | S1–Fe1–S2 | 92.04(2)         |
| C2–C3   | 1.367(4)        | Fe1–S1–C6 | 108.93(9)        |
| C3–C4   | 1.393(4)        | Fe1–S2–C6 | 106.95(9)        |
| C4–C5   | 1.355(4)        |           |                  |
| C5–N1   | 1.353(4)        |           |                  |
| S1–C1   | 1.716(3)        |           |                  |
| N2–C6   | 1.346(3)        |           |                  |
| C6–C7   | 1.412(4)        |           |                  |
| C7–C8   | 1.363(4)        |           |                  |
| C8–C9   | 1.394(4)        |           |                  |
| C9–C10  | 1.364(4)        |           |                  |
| C10–N2  | 1.346(3)        |           |                  |
| S2–C6   | 1.717(3)        |           |                  |
| N1···O4 | 2.747(3)        |           |                  |
| N2···O2 | 2.706(3)        |           |                  |

<sup>a</sup>Numbers in parentheses are estimated standard deviations of the last significant figure. Atoms are labeled as indicated Figures 1 and S6.

**Table S4.** Summary of the Conditions and Amount of Oxidation Product Isolated for the Reaction of Compounds **2**, **4**, and **5** with Dioxygen in CH<sub>2</sub>Cl<sub>2</sub>.

| Compound | [Fe <sub>2</sub> ] (mM) | Reaction Time (h) | % Oxidized Ligand Recovered <sup>a</sup> |
|----------|-------------------------|-------------------|------------------------------------------|
| <b>2</b> | 8.6                     | 1.5               | 29                                       |
| <b>4</b> | 8.2                     | 1.5               | 58                                       |
| <b>5</b> | 5.1                     | 16                | 40                                       |

<sup>a</sup>Based on [Fe<sub>2</sub>]

**Table S5.** Summary of conditions and amount of oxidation product isolated for the reaction of **1** and **3** with additional equiv of phosphine and dioxygen

| [Fe <sub>2</sub> ] (mM) | Compound | Equiv 2-Ph <sub>2</sub> Ppy<br>Added | Reaction Time<br>(h) | Equiv 2-Ph <sub>2</sub> P(O)py<br>Recovered <sup>a</sup> |
|-------------------------|----------|--------------------------------------|----------------------|----------------------------------------------------------|
| 2.5                     | <b>1</b> | 8.44                                 | 1                    | 3.98                                                     |
| 1.4                     | <b>1</b> | 47.0                                 | 13                   | 13.4                                                     |
| 0.31                    | <b>1</b> | 51.5                                 | 17                   | 17.0                                                     |
| 3.2                     | <b>3</b> | 8.55                                 | 17                   | 2.95                                                     |
|                         |          | Equiv PPh <sub>3</sub><br>Added      |                      | Equiv (O)PPh <sub>3</sub><br>Recovered                   |
| 0.42                    | <b>1</b> | 5.62                                 | 14                   | 0.70                                                     |

<sup>a</sup>Including 1 equiv of 2-Ph<sub>2</sub>Ppy from [Fe<sub>2</sub>].

**Table S6.** Selected Interatomic Distances (Å) and Angles (deg) for [Fe<sub>6</sub>(μ<sub>4</sub>-O)<sub>2</sub>(μ-OH)<sub>6</sub>-(μ-O<sub>2</sub>CAr<sup>Tol</sup>)<sub>4</sub>Cl<sub>4</sub>(2-Ph<sub>2</sub>P(O)py)<sub>2</sub>] (7)<sup>a</sup>

|            |          |            |          |             |            |
|------------|----------|------------|----------|-------------|------------|
| Fe1–O1     | 2.010(7) | Fe2–O3     | 1.993(6) | Fe3–O2      | 1.890(7)   |
| Fe1–O2     | 2.036(6) | Fe2–O3A    | 1.990(6) | Fe3–O3      | 2.260(6)   |
| Fe1–O3     | 1.911(6) | Fe2–O6     | 2.036(6) | Fe3–O7A     | 1.922(6)   |
| Fe1–O4     | 2.049(6) | Fe2–O7     | 2.022(6) | Fe3–O9      | 1.898(6)   |
| Fe1–O5     | 2.044(6) | Fe2–O8     | 2.007(6) | Fe3–Cl2     | 2.215(3)   |
| Fe1–Cl1    | 2.290(3) | Fe2–O9     | 2.007(6) | Fe3···Fe2   | 3.143(2)   |
| Fe1–Fe3    | 3.157(2) | Fe2···Fe2A | 3.029(3) | Fe3A···Fe2  | 3.158(2)   |
| O1–Fe1–Cl1 | 95.8(2)  | O3–Fe2–O3A | 81.0(3)  | Cl2–Fe3–O2  | 104.9(2)   |
| O2–Fe1–Cl1 | 176.8(2) | O3–Fe2–O6  | 98.5(3)  | Cl2–Fe3–O3  | 177.57(19) |
| O3–Fe1–Cl1 | 97.0(2)  | O3–Fe2–O7  | 101.6(3) | Cl2–Fe3–O7A | 101.9(2)   |
| O4–Fe1–Cl1 | 91.7(2)  | O3–Fe2–O8  | 164.8(3) | Cl2–Fe3–O9  | 105.9(2)   |
| O5–Fe1–Cl1 | 89.4(2)  | O3–Fe2–O9  | 80.5(3)  | O2–Fe3–O3   | 74.9(2)    |
| O1–Fe1–O2  | 87.1(3)  | O6–Fe2–O3A | 164.3(3) | O2–Fe3–O7A  | 117.2(3)   |
| O1–Fe1–O3  | 167.1(3) | O6–Fe2–O7  | 84.2(3)  | O2–Fe3–O9   | 115.5(3)   |
| O1–Fe1–O4  | 84.9(3)  | O6–Fe2–O8  | 87.6(3)  | O3–Fe3–O7A  | 76.2(2)    |
| O1–Fe1–O5  | 84.3(3)  | O6–Fe2–O9  | 93.9(3)  | O3–Fe3–O9   | 76.3(2)    |
| O2–Fe1–O3  | 80.0(3)  | O7–Fe2–O3A | 80.6(3)  | O9–Fe3–O7A  | 109.7(3)   |
| O2–Fe1–O4  | 89.8(3)  | O7–Fe2–O8  | 92.7(3)  |             |            |
| O2–Fe1–O5  | 89.7(3)  | O7–Fe2–O9  | 177.3(3) |             |            |
| O3–Fe1–O4  | 95.2(3)  | O8–Fe2–O3A | 96.89(3) |             |            |
| O3–Fe1–O5  | 95.2(3)  | O8–Fe2–O9  | 85.3(3)  |             |            |
| O4–Fe1–O5  | 169.3(3) | O9–Fe2–O3A | 101.5(3) |             |            |

<sup>a</sup>Numbers in parentheses are estimated standard deviations of the last significant figure. Atoms are labeled as indicated Figures 4 and S9.



**Table S7.** Bond Valence Sum Analysis of Iron-Ligand Bonds in **7** and **8**

| Bond                                                                                                                                                                       | Bond Length (Å) | Bond Valence | Bond Valence Sum |
|----------------------------------------------------------------------------------------------------------------------------------------------------------------------------|-----------------|--------------|------------------|
| <b>[Fe<sub>6</sub>(μ<sub>4</sub>-O)<sub>2</sub>(μ-OH)<sub>6</sub>(μ-O<sub>2</sub>CAr<sup>1ol</sup>)<sub>4</sub>Cl<sub>4</sub>(2-Ph<sub>2</sub>P(O)py)<sub>2</sub>] (7)</b> |                 |              |                  |
| Fe1-O1                                                                                                                                                                     | 2.010(7)        | 0.507        | 3.306            |
| Fe1-O2                                                                                                                                                                     | 2.036(6)        | 0.473        |                  |
| Fe1-O3                                                                                                                                                                     | 1.911(6)        | 0.663        |                  |
| Fe1-O4                                                                                                                                                                     | 2.049(6)        | 0.457        |                  |
| Fe1-O5                                                                                                                                                                     | 2.044(6)        | 0.463        |                  |
| Fe1-Cl1                                                                                                                                                                    | 2.290(3)        | 0.743        |                  |
| -----                                                                                                                                                                      |                 |              |                  |
| Fe2-O3                                                                                                                                                                     | 1.993(6)        | 0.531        | 3.054            |
| Fe2-O3A                                                                                                                                                                    | 1.990(6)        | 0.536        |                  |
| Fe2-O6                                                                                                                                                                     | 2.036(6)        | 0.473        |                  |
| Fe2-O7                                                                                                                                                                     | 2.022(6)        | 0.491        |                  |
| Fe2-O8                                                                                                                                                                     | 2.007(6)        | 0.512        |                  |
| Fe2-O9                                                                                                                                                                     | 2.007(6)        | 0.512        |                  |
| -----                                                                                                                                                                      |                 |              |                  |
| Fe3-O2                                                                                                                                                                     | 1.890(7)        | 0.702        | 3.20             |
| Fe3-O3                                                                                                                                                                     | 2.260(6)        | 0.258        |                  |
| Fe3-O7A                                                                                                                                                                    | 1.922(6)        | 0.644        |                  |
| Fe3-O9                                                                                                                                                                     | 1.898(6)        | 0.687        |                  |
| Fe3-Cl2                                                                                                                                                                    | 2.215(3)        | 0.910        |                  |
| <b>[Fe<sub>2</sub>(μ-OH)<sub>2</sub>(μ-O<sub>2</sub>CAr<sup>4-FPh</sup>)(O<sub>2</sub>CAr<sup>4-FPh</sup>)<sub>3</sub>(OH<sub>2</sub>)(2-Ph<sub>2</sub>P(O)py)] (8)</b>    |                 |              |                  |
| Fe1-N1                                                                                                                                                                     | 2.210(4)        | 0.383        | 3.131            |
| Fe1-O1                                                                                                                                                                     | 2.023(3)        | 0.490        |                  |
| Fe1-O2                                                                                                                                                                     | 1.954(4)        | 0.590        |                  |
| Fe1-O3                                                                                                                                                                     | 1.981(4)        | 0.549        |                  |
| Fe1-O5                                                                                                                                                                     | 2.003(3)        | 0.517        |                  |
| Fe1-O7                                                                                                                                                                     | 1.947(3)        | 0.602        |                  |
| -----                                                                                                                                                                      |                 |              |                  |
| Fe2-O2                                                                                                                                                                     | 1.981(4)        | 0.549        | 3.118            |
| Fe2-O3                                                                                                                                                                     | 1.977(4)        | 0.555        |                  |
| Fe2-O4                                                                                                                                                                     | 2.097(4)        | 0.401        |                  |
| Fe2-O6                                                                                                                                                                     | 2.017(3)        | 0.498        |                  |
| Fe2-O9                                                                                                                                                                     | 1.974(3)        | 0.559        |                  |
| Fe2-O11                                                                                                                                                                    | 1.976(3)        | 0.556        |                  |

## Chart S1

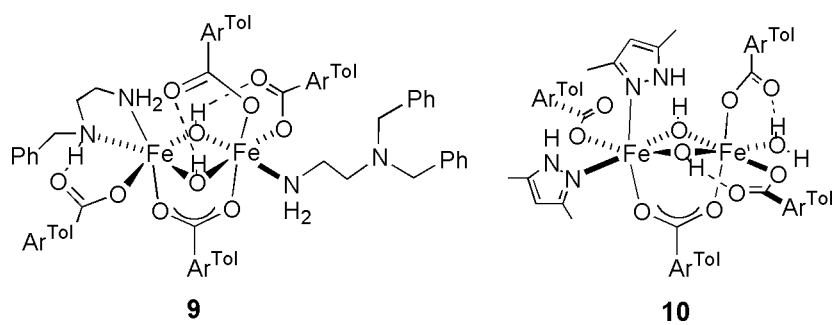

Scheme S1

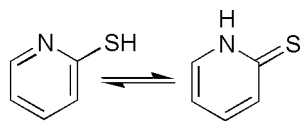

### Captions for Supporting Figures

**Figure S1.** Top: ORTEP diagram of  $[\text{Fe}_2(\mu\text{-O}_2\text{CAr}^{4\text{-FPh}})_3(\text{O}_2\text{CAr}^{4\text{-FPh}})(2\text{-Ph}_2\text{Ppy})]$  (**3**) illustrating 50% probability thermal ellipsoids for all non-hydrogen atoms. Bottom: Drawing in which the aromatic rings of the  $\text{O}_2\text{CAr}^{4\text{-FPh}}$  ligands are omitted for clarity.

**Figure S2.** FT-IR spectra of KBr pellets of  $[\text{Fe}_2(\mu\text{-O}_2\text{CAr}^{4\text{-FPh}})_3(\text{O}_2\text{CAr}^{4\text{-FPh}})(2\text{-Ph}_2\text{Ppy})]$  (**3**) (top) and  $[\text{Fe}_2(\mu\text{-OH})_2(\mu\text{-O}_2\text{CAr}^{4\text{-FPh}})(\text{O}_2\text{CAr}^{4\text{-FPh}})_3(\text{OH}_2)(2\text{-Ph}_2\text{P(O)py})]$  (**8**) (bottom).

**Figure S3.** Top: ORTEP diagram of  $[\text{Fe}_2(\mu\text{-O}_2\text{CAr}^{\text{Tol}})_3(\text{O}_2\text{CAr}^{\text{Tol}})(2\text{-MeSpy})]$  (**4**) showing 50% probability thermal ellipsoids for all non-hydrogen atoms. Bottom: Drawing in which the aromatic rings of  $\text{O}_2\text{CAr}^{\text{Tol}}$  are omitted for clarity.

**Figure S4.** Top: ORTEP diagram of  $[\text{Fe}_2(\mu\text{-O}_2\text{CAr}^{\text{Tol}})(\text{O}_2\text{CAr}^{\text{Tol}})_2(2\text{-MeS(O)py})_2]$  (**5**) showing 50 % probability thermal ellipsoids for all non-hydrogen atoms. Bottom: Drawing in which the aromatic rings of  $\text{O}_2\text{CAr}^{\text{Tol}}$  are omitted for clarity.

**Figure S5.** FT-IR spectra of KBr pellets of  $[\text{Fe}_2(\mu\text{-O}_2\text{CAr}^{\text{Tol}})_3(\text{O}_2\text{CAr}^{\text{Tol}})(2\text{-MeSpy})]$  (**4**) (top) and  $[\text{Fe}_2(\mu\text{-O}_2\text{CAr}^{\text{Tol}})_2(\text{O}_2\text{CAr}^{\text{Tol}})_2(2\text{-MeS(O)py})_2]$  (**5**) (bottom). The arrow designates  $\nu_{\text{S-O}}$ .

**Figure S6.** Top: ORTEP diagram of  $[\text{Fe}(\text{O}_2\text{CAr}^{\text{Tol}})_2(2\text{-HSpy})_2]$  (**6**) showing 50 % probability thermal ellipsoids for all non-hydrogen atoms. Bottom: Drawing in which the aromatic rings of  $\text{O}_2\text{CAr}^{\text{Tol}}$  are omitted for clarity.

**Figure S7.** FT-IR spectrum of a KBr pellet of  $[\text{Fe}(\text{O}_2\text{CAr}^{\text{Tol}})_2(2\text{-HSpy})_2]$  (**6**).

**Figure S8.** Mössbauer spectrum (experimental data (|), calculated fit (—)) recorded at 4.2 K for a solid sample of  $[\text{Fe}_2(\mu\text{-O}_2\text{CAr}^{4\text{-FPh}})_3(\text{O}_2\text{CAr}^{4\text{-FPh}})(2\text{-Ph}_2\text{Ppy})]$  (**3**).

**Figure S9.** Top: ORTEP diagram of  $[\text{Fe}_6(\mu_4\text{-O})_2(\mu\text{-OH})_6(\mu\text{-O}_2\text{CAr}^{\text{Tol}})_4\text{Cl}_4(2\text{-Ph}_2\text{P(O)py})_2]$  (**7**) illustrating 50% probability thermal ellipsoids for all non-hydrogen atoms. Bottom: Drawing in which the aromatic rings of the  $\text{O}_2\text{CAr}^{\text{Tol}}$  ligands are omitted for clarity.

**Figure S10.** Top: ORTEP diagram of  $[\text{Fe}_2(\mu\text{-OH})_2(\mu\text{-O}_2\text{CAr}^{4\text{-FPh}})(\text{O}_2\text{CAr}^{4\text{-FPh}})_3(\text{OH}_2)(2\text{-Ph}_2\text{P(O)py})]$  (**8**) illustrating 50% probability thermal ellipsoids for all non-hydrogen atoms. Bottom: Drawing in which the aromatic rings of the  $\text{O}_2\text{CAr}^{4\text{-FPh}}$  ligands are omitted for clarity.

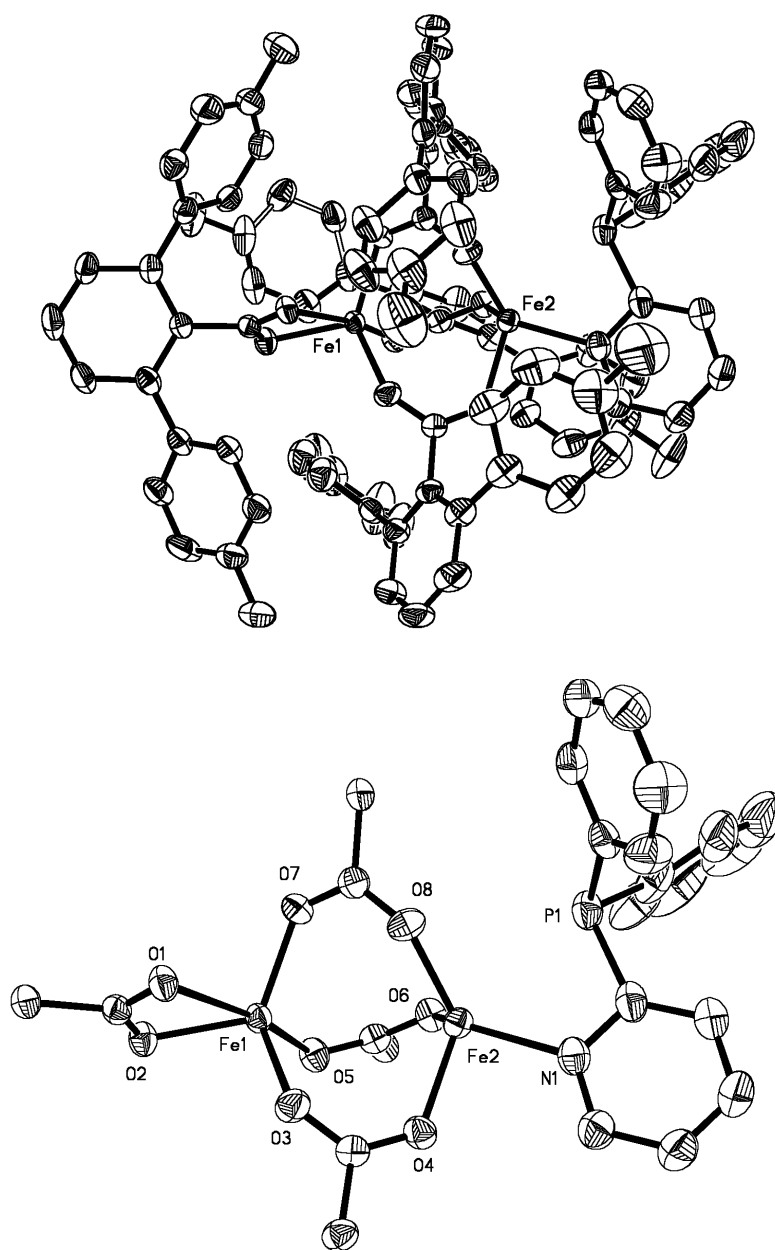

**Figure S1.** Carson and Lippard

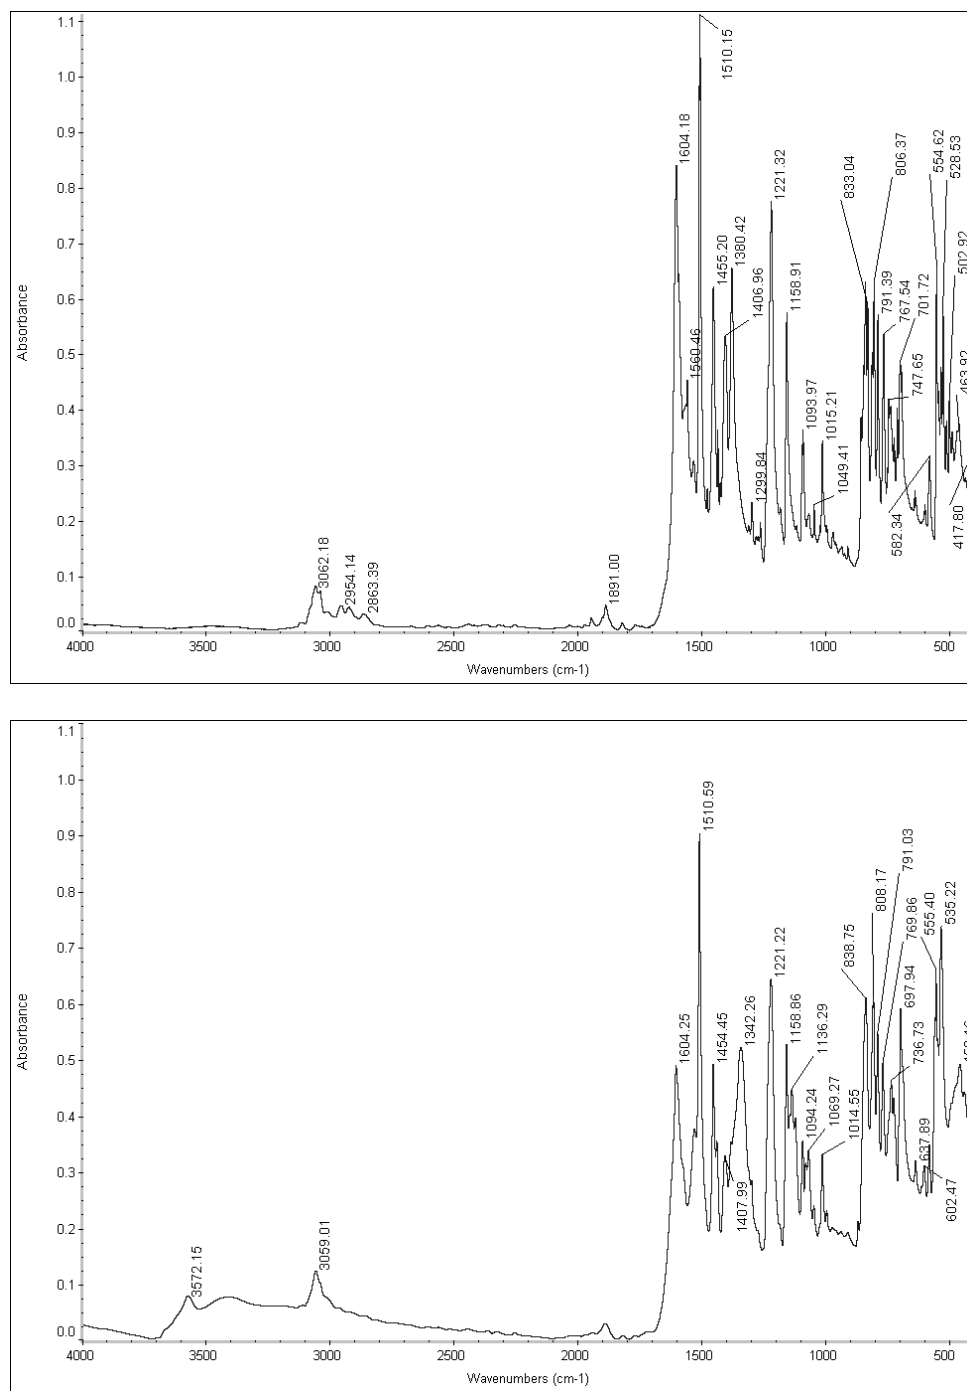

Figure S2. Carson and Lippard

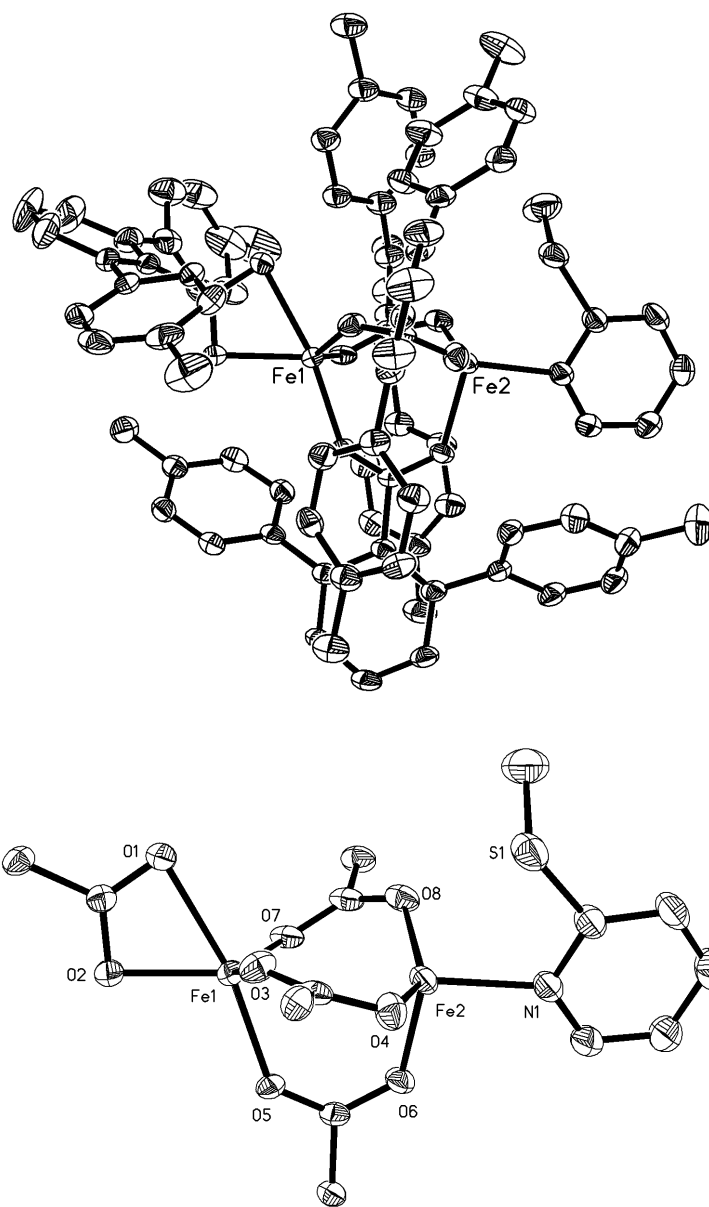

**Figure S3.** Carson and Lippard

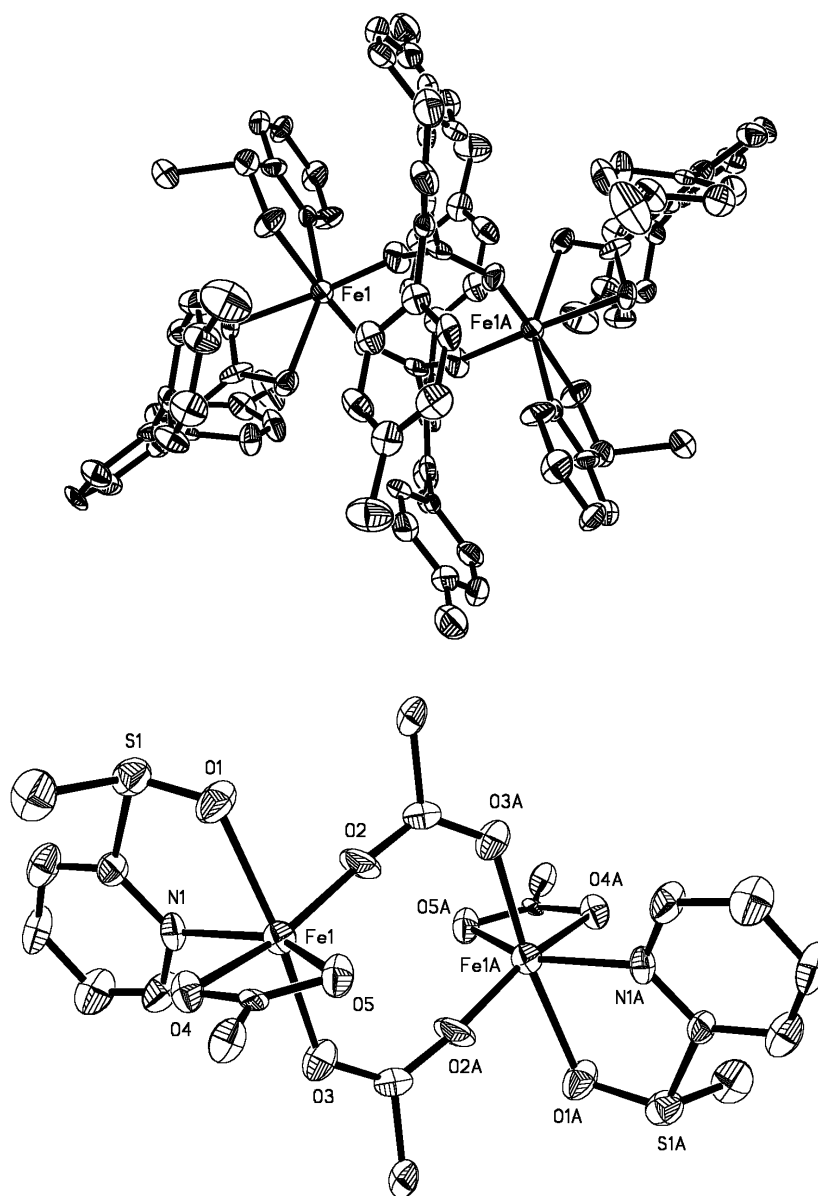

**Figure S4.** Carson and Lippard



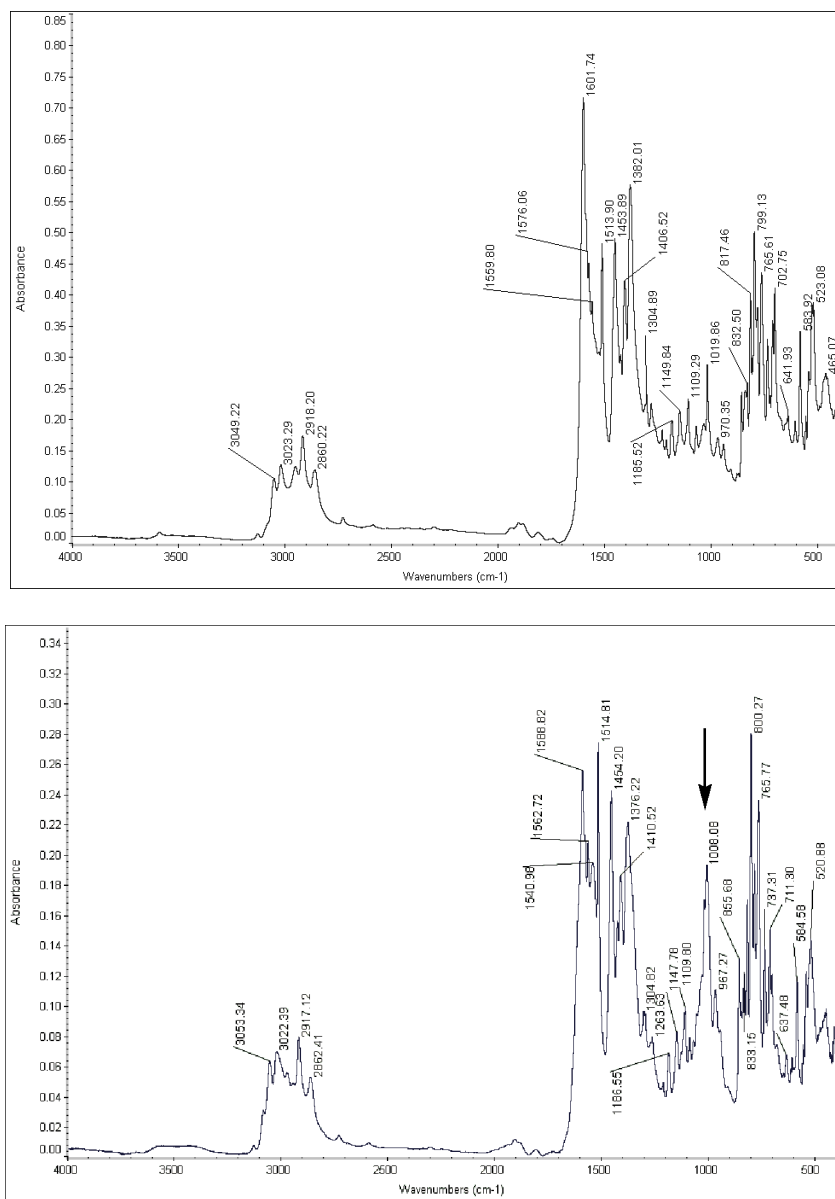

Figure S5. Carson and Lippard



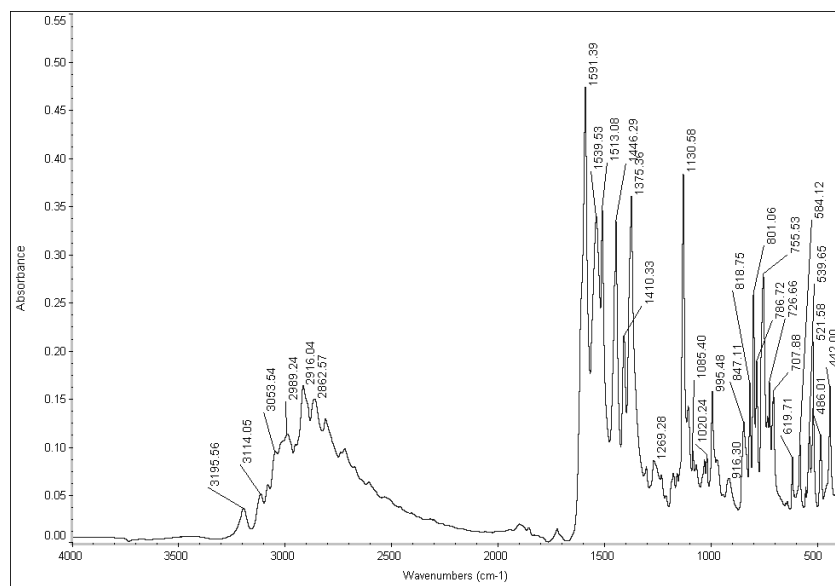

Figure S7. Carson and Lippard

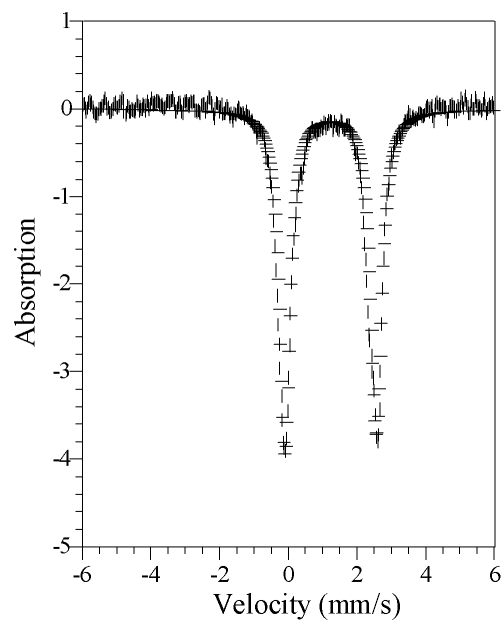

**Figure S8.** Carson and Lippard

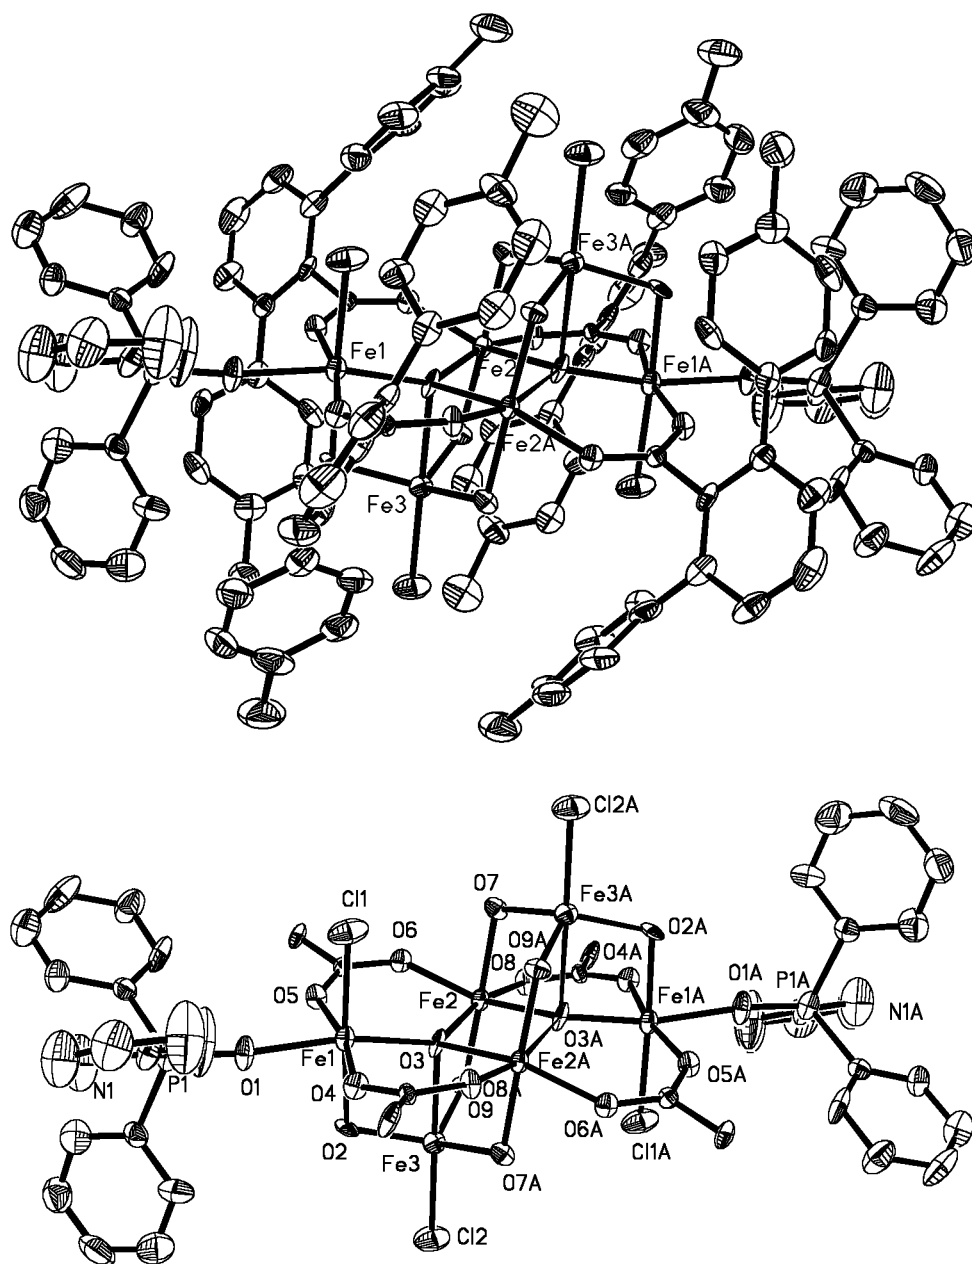

Figure S9. Carson and Lippard

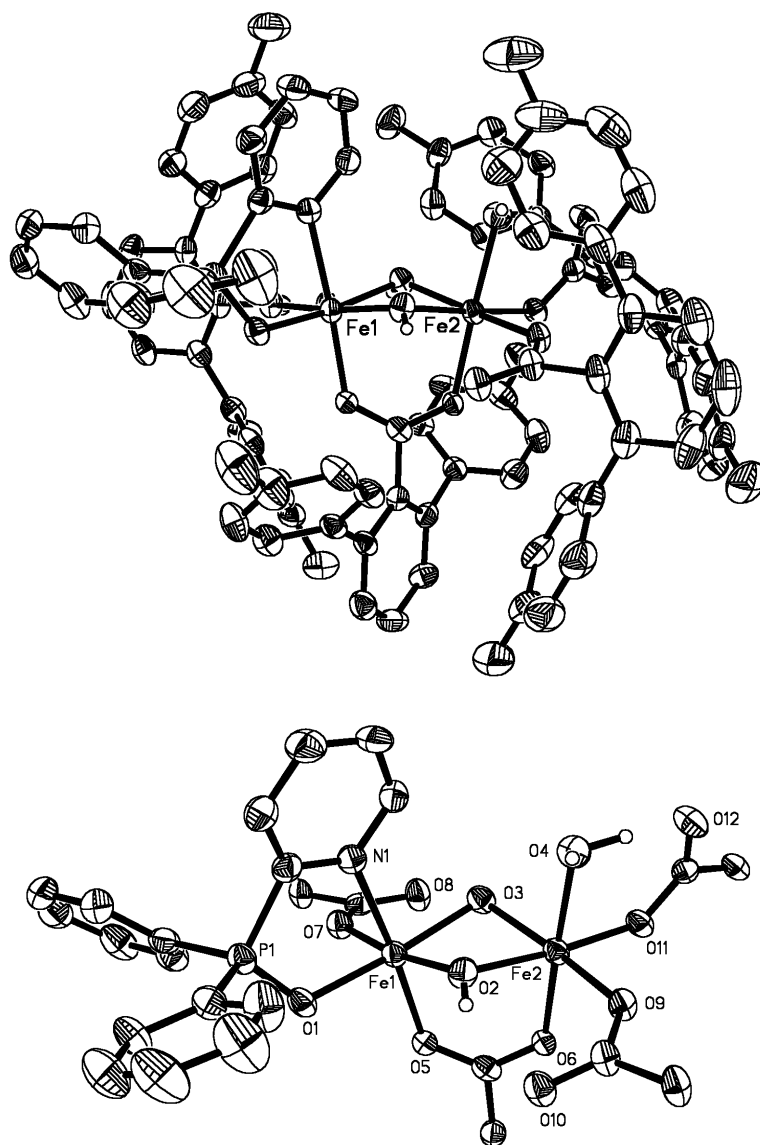

**Figure S10.** Carson and Lippard
